# Supplementary material
Source: publisher figshare collection journal article supplement (https://gsapubs.figshare.com/ndownloader/files/24570788)
Supplement: Supplementary file 1 [file 24570788]

## Sheet: Instrumental Metadata
Table S2. Metadata for LA-ICP-MS U-(Th-)Pb analyses
Laboratory and Sample Preparation
Laboratory name	Boise State University Isotope Geology Laboratory	University of California Santa Barbara
Sample type/mineral	Zircon	Zircon
Sample preparation	Conventional mineral separation, 1 inch resin mount, 0.3 mm polish to finish	Conventional mineral separation, 1 inch resin mount, 0.3 mm polish to finish
Imaging	CL, JEOL T300, 10 nA, 17 mm working distance	Centaurus CL detector, FEI Quanta 400f field-emission SEM
Laser ablation system
Make, Model and type	ESI/New Wave Research, UP213	Photon Machines Excite
Ablation cell and volume	Standard ablation cell	Standard ablation cell
Laser wavelength (nm)	213 nm	193 nm
Pulse width (ns)	4 ns	<4ns
Fluence (J cm-2)	~5 J cm-2	~1 J cm-2
Repetition rate (Hz)	10 Hz	4 Hz
Ablation duration (s)	30 s	15 s
Ablation pit depth / ablation rate	30 mm pit depth, measured using an optical microscope, equivalent to 0.1 mm/pulse	~0.07 µm/pulse
Spot diameter (mm)	15 mm	25 mm
Sampling mode / pattern	Static spot ablation	Static spot ablation
Carrier gas	100% He in the cell, Ar make-up gas combined using a Y-piece 70 cm from the torch.	100% He in the cell, Ar make-up gas combined in a mixing bulb
Cell carrier gas flow (l min-1)	1.15 l min-1	0.25 L min-1
ICP-MS Instrument
Make, Model and type	ThermoElectron, X-series II, quadrupole	Nu Plasma 3D MC-ICPMS
Sample introduction	Ablation aerosol transported through 190 cm long, 1.5 cm dia. tygon tubing coil	Aerosol transported in ~1 m long 4mm PTFE tubing
RF power (W)	1400 W	1300 W
Make-up gas flow (l min-1)	0.74 l min-1 Ar	~1.9 L min-1 Ar
Detection system	single ion-counting SEM	single ion-counting SEM
Masses measured and dwell times per peak (ms)	29,91(5); 31,89,93,139,140,141,146,147,153,157,159,163,165,166,169,172,175,177,181(10); 202,204,208,232,238(40); 206(80); 49,207(200)	238 (100), 232 (100), 208 (100), 207 (100), 206 (100), 204 (100), 202 (100) measured simultaneously
Total integration time per output data point (s)	~ 0.895 s	0.1 s
‘Sensitivity’ as useful yield (%, element)	0.01% U	0.7% U
	((#ions detected/#atoms sampled)*100; Schaltegger et al. 2015)	(#ions detected/#atoms sampled)*100; Schaltegger et al. 2015
IC Dead time (ns)	29 ns	~8 ns
Data Processing
Gas blank	30 s on-peak zero subtracted	20 s on-peak zero subtracted
Calibration strategy	Plešovice used as primary reference material, Seiland, Zirconia, R33 used as secondaries/validation	91500 used as primary reference material, GJ-1, Plešovice, Piexe used as secondaries/validation
Reference Material info	Plešovice (Slama et al. 2008); 336.9 Ma	Plešovice (Slama et al. 2008); 337 Ma
	Seiland (Kosler et al. 2008); 530.6 Ma	91500 (Wiedenbeck et al. 1995); 1065 Ma
	Zirconia (Covey et al., 2012); 327.2 Ma	Peixe (Dickinson and Gehrels 2003); 564 Ma
	R33 (Black et al., 2004); 419.3 Ma	GJ-1 (Jackson et al. 2004); 602 Ma
	FC1 (Schoene et al. 2007); 1095.4 Ma
Data processing package used / Correction for LIEF	ThermoElectron Plasmalab TRA software for integrated cps acquisition; in-house Microsoft VBA coded spreadsheet for data normalisation, concentration calibration, uncertainty propagation and age calculation.	Iolite (Paton et al.2010; Kylander-Clark et al.2013)
Mass discrimination	207Pb/206Pb and 206Pb/238U normalised to reference material	207Pb/206Pb and 206Pb/238U normalised to reference material
Common-Pb correction, composition and uncertainty	No common-Pb correction applied; ablation sweeps with mass 204 signals above background rejected.	No common-Pb correction applied; ablation sweeps with mass 204 signals above background rejected.
Uncertainty level and propagation	Ages are quoted at 2s absolute, propagation is by quadratic addition.	Ages are quoted at 2s absolute, propagation is by quadratic addition.
	Systematic errors based upon reproducibility of reference material are propagated where appropriate: 0.7% (2s) for Pb/U and 0.5% (2s) for Pb/Pb.	Systematic errors based upon reproducibility of reference material are propagated where appropriate: 1.1% (2s) for Pb/U and 0.6% (2s) for Pb/Pb.
Quality control / Validation	R33 – Wtd ave 207Pb/206Pb age = 1091 ± 23 (2s, MSWD = 2.3, n = 12)	Plešovice – Wtd ave 206Pb/238U age = 337.69 ± 0.97 (2s, MSWD = 1.05, n = 9)
	FC1 – Wtd ave 206Pb/238U age = 1087 ± 8 (2s, MSWD = 1.2, n = 12)	Peixe – Wtd ave 206Pb/238U age = 571.75 ± 2.11 (2s, MSWD = 1.03, n = 5)
	Seiland – Wtd ave 206Pb/238U age = 525 ± 13 (2s, MSWD = 3.5, n = 9)	91500 – Wtd ave 206Pb/238U age = 1063.22 ± 1.67 (2s, MSWD = 0.46, n = 21)
		GJ-1 – Wtd ave 206Pb/238U age = 600.53 ± 1.51 (2s, MSWD = 0.23, n = 12)

## Sheet: Sample Data
Table S2. LA-ICPMS U-Pb geochronologic analyses and trace element concentrations
Sample CC1801-138
					Corrected isotope ratios																				Concentrations (ppm)																							CI chondrite normalizing values from Sun & McDonough
	U	Th			208Pb*	±2s	207Pb*	±2s	206Pb*	±2s	error	238U	±2s	207Pb*	±2s		207Pb*	±2s	207Pb*	±2s	206Pb*	±2s																										0.237	0.612
Analysis	ppm	ppm	Th/U		232Th	(%)	235U*	(%)	238U	(%)	corr.	206Pb*	(%)	206Pb*	(%)		206Pb*	(Ma)	235U	(Ma)	238U*	(Ma)	% disc.		P	Ti	Y	Nb	La	Ce	Pr	Nd	Sm	Eu	Gd	Tb	Dy	Ho	Er	Tm	Yb	Lu	Hf	Ta	Th	U		La	Ce
CC1801-138 S-11	66.5	39.7	0.596992		0.029	5.86	0.705	2.84	0.0867	1.8	0.51949	11.534	1.8454	0.0592	2.36		567	52	541	12	535.9	9.4	5.48501		64	15	1790	3.68		7.2	0.0394	42	20.3	3.8	81	18.6	167	63.8	299	49.4	434	74	9150	2	39.7	66.5			11.7455
CC1801-138 S-71	39.4	24.8	0.629442		0.0277	6.5	0.718	3.06	0.0878	1.7	0.21244	11.3895	1.7084	0.0587	3.07		557	69	552	14	542.4	8.7	2.62118		52	5.1	1480	1.88	0.000612	6.7	0.37		20.9	13.8	69	25.2	191	50.9	188	35.6	377	52.6	8160	4.7	24.8	39.4		0.00258228	10.9477
CC1801-138 M-3	96	62.1	0.646875		0.0278	3.96	0.703	1.85	0.08755	1.1	0.58875	11.422	1.1193	0.05855	1.6		553	33	540.5	7.9	541	5.8	2.16998		104	10.2	1770	2.33		26.2	3.3		31	6.7	66	27.6	277	71	253	55.4	501	77.6	8500	8.1	62.1	96			42.8105
CC1801-138 M-19	220.3	147	0.667272		0.0284	5.99	0.673	3.71	0.08643	1.2	0.35357	11.5701	1.1223	0.0572	3.32		486	75	528	15	534.4	5.8	-9.95885		32	8	1620	4.2	0.0397	5			7	4.1	56	17.1	257	52	214	48	366	53	8680	0	147	220.3		0.167511	8.16993
CC1801-138 S 43 8/19/2019 8:31:56 PM (Run: 1)	71.8832	66.2728	0.921952		0.0217208	11.8585	0.711354	9.01493	0.0867223	4.41505	0.483644	11.5311	4.41505	0.0594913	7.85979		585.09	170.6	545.55	38.0485	536.123	22.7126	8.36908		173.133	21.3905	2119.83	2.91619	1.58766	10.313	0.997305	12.5677	16.5174	3.84755	68.1538	23.3124	234.076	76.3775	307.133	65.8464	554.759	77.8185	9233.52	1.78795	66.2728	71.8832		6.69898	16.8513
CC1801-138 S 49 8/19/2019 8:43:38 PM (Run: 1)	208.27	285.3	1.36985		0.0240019	6.95191	0.709579	6.2361	0.0867191	3.78229	0.596232	11.5315	3.78229	0.0593451	4.95815		579.763	107.714	544.496	26.2818	536.104	19.4568	7.53046		82.9504	4.04832	5189.08	16.2287	0.398326	31.2262	0.816419	20.5389	39.3731	3.9984	185.83	62.1704	639.288	204.444	786.676	161.403	1350.08	181.283	6607.49	6.64503	285.3	208.27		1.6807	51.0231
CC1801-138 S 67 8/19/2019 9:34:53 PM (Run: 1)	123.148	117.818	0.956719		0.0240161	6.7814	0.695235	4.70655	0.0814592	2.97274	0.614389	12.2761	2.97274	0.0618999	3.64889		670.675	78.0776	535.941	19.599	504.826	14.4346	24.7286		211.943	25.2541	3004.99	5.25366	0.0392998	9.962	0.674245	12.9732	25.1141	5.91704	103.707	34.8572	359.612	114.636	429.58	95.5218	877.775	101.046	7723.35	2.43991	117.818	123.148		0.165822	16.2778
CC1801-138 S 66 8/19/2019 9:32:55 PM (Run: 1)	86.629	75.2731	0.868913		0.0247153	4.72159	0.658355	8.3868	0.0833721	3.40887	0.398023	11.9944	3.40887	0.0572715	7.66277		502.036	168.681	513.607	33.8072	516.219	16.9111	-2.82512		225.44	23.2325	2240.69	3.15903		8.09185	0.727135	11.0931	18.0399	4.3648	76.6244	25.2111	263.603	84.76	318.329	70.8094	640.746	76.7279	7853.18	1.49387	75.2731	86.629		0.191755	13.222
CC1801-138 S 68 8/19/2019 9:36:50 PM (Run: 1)	509.651	872.695	1.71234		0.0207522	2.48502	0.611048	3.83972	0.0706686	2.33173	0.580346	14.1506	2.33173	0.0627115	3.05065		698.486	64.9788	484.221	14.7875	440.182	9.9213	36.9805		522.974	43.0604	4360.35	56.7607	7.8886	102.674	3.74926	32.8985	44.53	12.4246	160.025	53.9359	538.158	161.803	600.209	122.34	1110.07	124.092	8629.37	15.1592	872.695	509.651		33.2852	167.767
CC1801-138 S-70	192	104.2	0.542708		0.01745	3	0.408	2.94	0.05155	0.78	0.37481	19.3986	0.71773	0.0569	2.99		479	62	347.2	8.5	324	2.2	32.3591		152	5.3	2170	0.7		5.3	0.25		10.3	1.5	71	29.4	241	84.2	281	66.8	598	107	10650	0.9	104.2	192			8.66013
CC1801-138 S 44 8/19/2019 8:33:53 PM (Run: 1)	69.5927	58.547	0.841281		0.0226904	11.0941	0.585639	11.5159	0.0855554	3.59047	0.305908	11.6883	3.59047	0.0496456	10.9419		178.45	255.101	468.079	43.1871	529.198	18.2417	-196.553		158.422	20.2604	1910.76	3.41808		6.18186	0.313164	8.5947	14.4182	3.13141	56.84	20.6197	209.169	66.2769	276.892	60.5951	508.276	72.63	8976.27	2.03586	58.547	69.5927		0.0825855	10.1011
CC1801-138 M-2	117.9	74.8	0.634436		0.02833	3.3	0.692	2.02	0.0874	1.3	0.46451	11.4416	1.2586	0.0575	2.43		503	53	533.6	8.3	540.3	6.7	-7.41551			17	1800	2.9		9.4	1.01		17	3.5	84	38.6	270	76	270	57	483	71.3	9680	5.8	74.8	117.9			15.3595
CC1801-138 XS 72 8/19/2019 9:52:51 PM (Run: 1)	74.7163	56.0125	0.749669		0.050261	8.95981	1.75125	5.70627	0.178023	2.89796	0.493295	5.61725	2.89796	0.0713461	4.91562		967.34	100.329	1027.62	36.8808	1056.17	28.2314	-9.18245		245.67	33.8275	1149.7	1.00479		6.27519	0.299032	9.03277	12.8431	1.72258	46.354	14.1473	142.806	43.882	150.143	32.367	320.957	37.7046	7927.32	0.513821	56.0125	74.7163		0.0788588	10.2536
CC1801-138 XS 69 8/19/2019 9:38:49 PM (Run: 1)	606.24	332.592	0.548614		0.0685219	6.11453	2.40995	10.1985	0.201674	10.0318	0.981303	4.95849	10.0318	0.0866674	1.83621		1353.13	35.4194	1245.57	73.1857	1184.31	108.533	12.4761
CC1801-138 M-23	362	154	0.425414		0.0671	1.49	2.695	1.19	0.2158	1.1	0.72881	4.63392	1.066	0.09059	0.79		1437	15	1326.8	8.8	1260	12	12.3173		60	11.9	1151	2.17		38.6				11.8	45	18	132	37.9	155	40.1	384	70	12640	4.8	154	362			63.0719
CC1801-138 S 51 8/19/2019 8:55:33 PM (Run: 1)	70.767	53.0917	0.750232		0.0551022	4.80206	2.76417	5.73447	0.226817	3.61955	0.619526	4.40884	3.61955	0.0883869	4.44781		1390.9	85.3492	1345.92	42.7581	1317.79	43.1388	5.25596		119.411	11.0475	1054.34	0.892332		4.0546	0.0578244	1.58673	4.14934	0.730598	23.0661	7.69752	94.3412	35.6954	167.749	39.9186	386.396	62.3135	10386.5	0.415535	53.0917	70.767		0.0152491	6.62516
CC1801-138 S-12	218.7	136.9	0.625972		0.0783	2.43	2.994	0.935	0.2373	1	0.84094	4.21408	1.011	0.092	0.54		1466	10	1405.8	7.2	1373	13	6.34379		185		2100	2.23	0.00431	40		49	26.2	6.1	105	21.2	227	66.4	332	61.2	522	101.4	9720	1.06	136.9	218.7		0.0181857	65.2529
CC1801-138 S 54 8/19/2019 9:01:25 PM (Run: 1)	170.84	175.657	1.0282		0.0632717	2.98001	3.06202	3.56045	0.239852	2.03408	0.537893	4.16924	2.03408	0.09259	2.92221		1479.52	55.402	1423.24	27.2522	1385.93	25.3665	6.32578		279.829	19.8927	2273.66	2.04235	0.0641027	32.7137	0.803859	8.79448	16.8097	4.26837	65.759	21.7859	229.653	80.7293	337.502	76.9433	743.703	104.969	8662.11	0.693164	175.657	170.84		0.270476	53.4538
CC1801-138 S 47 8/19/2019 8:39:44 PM (Run: 1)	67.7377	112.013	1.65363		0.0605209	6.44306	3.08303	4.42624	0.240128	2.75638	0.602845	4.16445	2.75638	0.093118	3.46323		1490.29	65.5644	1428.48	33.936	1387.36	34.406	6.90649		156.893	53.9154	2107.14	1.23185	0.171912	47.5551	1.07958	19.5171	27.4073	9.33556	93.9271	24.4751	243.443	77.6794	287.149	55.3058	509.741	72.4708	8352.23	0.488698	112.013	67.7377		0.725366	77.7045
CC1801-138 S-4	55.1	55.6	1.00907		0.0736	3.94	3.044	2.4	0.2404	1.3	0.78314	4.15973	1.29	0.0918	1.53		1461	30	1418	18	1389	16	4.92813		89	24	1154	1.44		34.9	0.0365	16	16.7	3.6	67	11.3	127	39.3	190	29.5	271	52.2	9700	0.71	55.6	55.1			56.9331
CC1801-138 S-21	313	127.4	0.407029		0.0785	3.57	3.079	1.62	0.2422	1.4	0.91652	4.12882	1.445	0.09269	0.59		1480	11	1427	12	1398	18	5.54054		79		1100	1.62	0.0006	32.6		12.5	4	1.9	29	7.9	88	35.8	172	38.6	413	93	12100	0.26	127.4	313		0.00253165	53.1811
CC1801-138 S-28	177	134	0.757062		0.0731	3.15	2.983	1.14	0.2426	0.87	0.8147	4.12201	0.8656	0.08989	0.67		1422	13	1403	8.6	1400	11	1.54712		104	6	1270	2.36	0.00379	28.2	0.0334	11.9	12.3	1.15	41	8.3	117	39.9	211	43	408	77	9760	1.46	134	177		0.0159916	46.0033
CC1801-138 S-55	233.6	99.8	0.427226		0.074	2.03	2.949	1.12	0.243	0.86	0.55977	4.11523	0.8641	0.08839	0.94		1389	18	1394.4	8.6	1402	11	-0.935925		66	1	936	0.73	0.00408	21.7	-0.002	5.3	11.6	0.72	24	7.2	75	26.3	138	27.3	243	50.6	10990	0.11	99.8	233.6		0.0172152	35.3997
CC1801-138 S 62 8/19/2019 9:25:06 PM (Run: 1)	140.487	107.217	0.763179		0.0668044	5.30224	3.02579	3.24477	0.244548	2.28446	0.671492	4.08917	2.28446	0.0897371	2.30429		1419.96	44.0406	1414.14	24.7629	1410.3	28.937	0.680387		259.012	20.2942	1556.21	2.27297		24.4979	0.308438	5.19289	8.36757	3.10905	43.8173	13.6284	154.675	56.8612	230.272	53.1474	557.519	74.7314	8336.6	0.887123	107.217	140.487		0.0813392	40.0293
CC1801-138 S-69	67.6	37.1	0.548817		0.0766	4.18	3.079	1.49	0.2457	0.98	0.61947	4.07	0.9769	0.09071	1.1		1439	20	1427	12	1416	12	1.59833		35	0.9	900	0.79		21	0.23		4.6	6.4	27.1	13.4	110	30.8	117	27.3	259	46.5	8800	1.4	37.1	67.6			34.3137
CC1801-138 M-4	268	176	0.656716		0.0739	2.03	3.074	0.976	0.2462	0.97	0.7845	4.06174	0.9747	0.09037	0.48		1432.3	9	1426.1	7.5	1419	12	0.928576		27	13.8	1690	1.21	0.00505	81	0.35		44	30	87	29.3	213	64.9	194	45.5	467	75.2	10100	1.2	176	268		0.021308	132.353
CC1801-138 S-72	65	42.2	0.649231		0.0732	3.96	3.098	1.84	0.2465	1.4	0.75525	4.0568	1.379	0.0905	1.33		1434	25	1431	14	1420	18	0.97629		58	6.3	1083	0.81	0.000805	20			9.5	7.2	32	14.6	123	39.1	151	29.2	312	50.6	9260	0.9	42.2	65		0.00339662	32.6797
CC1801-138 M-14	90.7	44.2	0.487321		0.0798	6.52	3.062	1.73	0.247	1.6	0.79314	4.04858	1.619	0.0891	1.12		1405	22	1423	13	1423	20	-1.28114		71	6.6	641	0.9	0.01263	64.2	0.25		15	6.4	28	10.4	93	23.8	107	17	206	36.7	9410		44.2	90.7		0.0532911	104.902
CC1801-138 M-12	290	207	0.713793		0.076	2.11	3.098	1.16	0.2475	0.65	0.77726	4.0404	0.6465	0.09053	0.67		1435	13	1432	8.9	1425.5	8.4	0.662021		36	13.3	582	2.2	0.01431	56.4						5.8	64	18.3	78	26.1	301	60	12340		207	290		0.0603797	92.1569
CC1801-138 M-16	666	214	0.321321		0.077	3.64	3.085	1.2	0.2473	0.69	0.75643	4.04367	0.6875	0.09011	0.7		1427	13	1430.5	8.6	1426.8	9.6	0.0140154		47	10	425	1.1	0.0365	22.7							17	5.8	47	14.7	185	46	11620		214	666		0.154008	37.0915
CC1801-138 M-11	144.8	97.2	0.671271		0.0794	3.15	3.125	1.44	0.248	0.93	0.84263	4.03226	0.9275	0.09107	0.83		1447	16	1439	11	1428	12	1.31306		87	6.4	1427	0.33	0.00957	24.3			37	19.5	34	25	168	55.7	218	42.3	374	75	9810	1.7	97.2	144.8		0.0403797	39.7059
CC1801-138 S-50	174.6	91.9	0.526346		0.0729	2.47	3.113	0.932	0.2481	0.73	0.83951	4.03063	0.7254	0.0908	0.59		1441	11	1435.7	7.2	1428.4	9.2	0.874393		99	10	910	2.21	0.00391	37.1	0.0398	0	2.9	0	19.4	6.8	72	33.4	165	31	307	63.5	11610	1.38	91.9	174.6		0.0164979	60.522
CC1801-138 M-18	350	165	0.471429		0.079	2.91	3.117	1.35	0.2481	0.64	0.62125	4.03063	0.6448	0.09057	0.82		1436	16	1436	10	1428.6	8	0.51532		73	11	955	2.5		58	0.9		8	2.1	16	12.6	99	31.3	152	31.1	281	58	9950		165	350			94.7712
CC1801-138 S-16	250	134.8	0.5392		0.0711	1.83	3.125	1.06	0.2487	0.72	0.82834	4.02091	0.7237	0.0917	0.6		1460	11	1438.7	8.1	1431.7	9.4	1.93836		183	26	1780	2.36	0.00459	24.8		44	13.4	2.3	71	15	196	55.7	335	55.3	507	106.7	11160	0.29	134.8	250		0.0193671	40.4568
CC1801-138 S-56	160.9	95.3	0.592293		0.0726	2.75	3.061	1.21	0.2489	0.92	0.72191	4.01768	0.9242	0.0899	0.8		1422	15	1422.8	9.2	1433	12	-0.773558		110	34	1435	1.49	0.00418	20.5	0.022	29	16	2	50	10.9	144	47.8	216	42	378	73.8	9490	0.01	95.3	160.9		0.0176371	33.4421
CC1801-138 S-49	255	134.7	0.528235		0.0748	1.47	3.107	1.19	0.2489	0.96	0.83944	4.01768	0.9642	0.09058	0.67		1436	13	1434.1	9.2	1433	13	0.208914		160	26	1520	3.71	0.00388	63.4		26	22.5	2.6	56	13.5	150	48.4	252	45.7	425	86.9	10590	1.18	134.7	255		0.0163713	103.426
CC1801-138 S 46 8/19/2019 8:37:47 PM (Run: 1)	259.584	129.669	0.499528		0.0624436	4.51724	3.13373	3.50761	0.24928	2.59661	0.713625	4.01155	2.59661	0.0911743	2.35816		1450.24	44.8854	1441.01	26.9998	1434.76	33.4005	1.06736		234.67	12.0507	2374.03	6.86386		60.7343	0.276465	5.94852	11.6372	2.76852	53.1536	17.9123	226.6	82.1174	367.199	89.1007	901.969	134.904	10390.4	3.26405	129.669	259.584		0.0729075	99.2391
CC1801-138 S-52	263	142.2	0.540684		0.0789	2.03	3.128	0.831	0.2495	0.48	0.70759	4.00802	0.481	0.09101	0.56		1446	11	1439.5	6.3	1435.9	6.4	0.698479		122	12	1720	2.58	0.00433	30.3		5.4	20	1.31	49	12	183	60	329	49.6	506	88.9	11180	0.9	142.2	263		0.01827	49.429
CC1801-138 S-41	285	158	0.554386		0.0791	3.41	3.167	1.61	0.2496	1.6	0.94087	4.00641	1.643	0.09141	0.55		1454	11	1451	12	1436	21	1.23796		224	19	1680	2.74		58.8		31	13.6	4.4	42	14.4	185	62	316	53.5	498	108	12710	1.21	158	285			95.9217
CC1801-138 S-3	156.2	55.8	0.357234		0.076	3.55	3.226	1.21	0.2495	1	0.69532	4.00802	1.002	0.09283	0.86		1486	15	1463	9.3	1436	13	3.36474		110		880	2.82	0.00503	19.2	0.017	2.8	3.4	0.53	21.1	6.3	84	27.8	164	26.2	283	59.7	11330	1.66	55.8	156.2		0.0212236	31.3214
CC1801-138 M-15	1080	521	0.482407		0.0788	3.3	3.115	1.25	0.2501	1.4	0.70261	3.9984	1.36	0.08914	0.82		1406	16	1436	9.7	1439	17	-2.34708		79		940	0.0001085	0.0553	34			8		40	7	132	38	140	37	322	43	10600	0	521	1080		0.233333	55.5556
CC1801-138 S 57 8/19/2019 9:07:16 PM (Run: 1)	133.827	118.759	0.887409		0.0685511	4.90369	3.0432	2.79344	0.250119	2.07859	0.702461	3.99809	2.07859	0.0882433	1.86621		1387.78	35.8262	1418.53	21.3488	1439.09	26.8091	-3.69706		223.519	13.1511	1339.99	0.981774	0.0650021	48.2872	0.736981	12.3846	17.5242	6.24641	62.5904	15.5974	150.901	47.7958	182.383	42.177	403.382	55.808	7562.73	0.514077	118.759	133.827		0.274271	78.9006
CC1801-138 S-5	413	408.4	0.988862		0.0758	1.58	3.198	0.688	0.2503	0.6	0.78769	3.99521	0.5992	0.09238	0.44		1474.3	8.3	1457.6	5.5	1439.8	7.7	2.34009		96	16	1404	1.17	0.00433	54.6		34	21.2	2.8	67	11.6	139	41.6	230	39.3	364	64.2	11300	1.47	408.4	413		0.01827	89.0701
CC1801-138 S-78	144.4	74.6	0.51662		0.0741	2.7	3.152	0.888	0.2503	0.64	0.74872	3.99521	0.6393	0.09079	0.59		1441	11	1445.4	6.9	1439.9	8.5	0.0763359		52		1301	1.18		25.2	0.13		6.5	15.6	38	23	164	50.7	193	44.4	361	70.8	9530	3	74.6	144.4			41.1765
CC1801-138 S-26	129.5	61.2	0.472587		0.0741	3.24	3.102	1.19	0.2503	0.88	0.73894	3.99521	0.8791	0.09101	0.82		1449	16	1434.9	9.7	1440	11	0.621118		110	32	838	2.76	0.00389	54.4		6	5.7	1.07	16.7	5.6	79	24.6	138	29.7	277	60.5	9570	0.83	61.2	129.5		0.0164135	88.7439
CC1801-138 S-40	209	122.1	0.584211		0.0755	1.85	3.157	1.27	0.2505	0.88	0.77986	3.99202	0.8783	0.09058	0.75		1437	14	1446.3	9.7	1441	11	-0.278358		106	23	1523	1.66		46.2	0.028	0	7.8	0.56	45	11.5	158	43.6	243	44.1	462	92	11540	1.59	122.1	209			75.367
CC1801-138 S-51	228	67.7	0.29693		0.077	2.73	3.129	0.895	0.2506	0.72	0.81665	3.99042	0.7182	0.09072	0.41		1439.7	7.8	1439.8	6.9	1441.8	9.5	-0.145864		36	18	193	0.16	0.00458	8	0.0468	0	0	0	-1.3	0.54	8.8	5.1	33.4	6.8	101	33.9	12840	-0.0993	67.7	228		0.0193249	13.0506
CC1801-138 S-80	73.8	73.2	0.99187		0.0724	3.04	3.123	1.86	0.2507	1.6	0.84121	3.98883	1.595	0.0903	1.22		1435	24	1438	14	1442	21	-0.487805		44	4.3	940	0.71	0.00489	39.6	0.65		11	13.3	40	15.6	114	36.3	131	29	288	45.1	9160	0.9	73.2	73.8		0.0206329	64.7059
CC1801-138 M-20	236	108.7	0.460593		0.0807	3.47	3.158	1.08	0.2507	0.96	0.70304	3.98883	0.9574	0.09081	0.77		1441	15	1446.7	8.3	1442	12	-0.0693963		54	26	764	1.37		25.2	0.15				23	7	103	26.8	121	20.3	266	44	10530	0	108.7	236			41.1765
CC1801-138 S-20	217.6	111.8	0.513787		0.0823	2.55	3.113	1.03	0.2507	0.68	0.82881	3.98883	0.6781	0.09052	0.56		1435	11	1435.6	7.9	1442.2	8.8	-0.501742		115	28	1680	1.24	0.00478	26.6	0.014	16	21	2	71	14.1	176	62.3	311	53.7	483	87.4	10310	1.27	111.8	217.6		0.0201688	43.3931
CC1801-138 S-48	110	76	0.690909		0.0761	2.63	3.135	1.31	0.2509	1	0.85641	3.98565	1.036	0.09023	0.76		1429	15	1441	10	1443	13	-0.979706		116	15	1260	2	0.0001	71.1		14	28	2.8	57	14.8	159	39.1	211	38.4	299	64.5	9620		76	110		0.000421941	115.987
CC1801-138 S-8	148.7	73.2	0.492266		0.08	2.75	3.218	1.27	0.251	0.92	0.76458	3.98406	0.9164	0.09218	0.6		1470	11	1463.1	9.6	1443	12	1.83673		63	9	840	2.05	0.00498	28.9	0.017	0	2.7	1.13	13.8	6.4	69	26.8	145	27.5	301	64.9	11580	1.31	73.2	148.7		0.0210127	47.1452
CC1801-138 M-7	127.3	82.5	0.648075		0.0754	1.99	3.125	1.15	0.2511	0.48	0.55597	3.98248	0.4778	0.09039	0.89		1432	17	1438.5	8.7	1444.2	6.3	-0.851955		75	4.1	1370	1.8		36	0.21		8.2	7.2	47	24.8	164	50.9	199	40.3	409	76.7	10130	0	82.5	127.3			58.8235
CC1801-138 S-59	201.4	47.7	0.236842		0.0769	4.68	3.093	0.97	0.2516	0.87	0.67994	3.97456	0.8743	0.0894	0.77		1415	16	1430.7	7.5	1447	11	-2.26148		39		404	2.6		22.6	0.049	0	0	0	5.6	0.9	29.8	12.5	62	16.5	150	37.1	12290	0.34	47.7	201.4			36.8679
CC1801-138 S-27	280	180.5	0.644643		0.078	2.44	3.13	1.47	0.2519	1.5	0.92657	3.96983	1.469	0.09091	0.62		1444	12	1440	11	1448	19	-0.277008		132	11	1360	2.19	0.00457	39		28	12	1.51	45	12	131	44.1	223	41.6	382	70.7	10800	2.1	180.5	280		0.0192827	63.6215
CC1801-138 S-10	212.1	129.8	0.611975		0.074	2.03	3.191	1.1	0.2519	0.87	0.79215	3.96983	0.8733	0.0917	0.64		1460	12	1454.7	8.6	1448	11	0.821918		117	20	1620	1.99	0.00408	39.4	0.0319	16	10.2	2.7	53	12.9	165	51.4	265	50.7	454	87.2	10550	0.64	129.8	212.1		0.0172152	64.2741
CC1801-138 S-68	156	65.4	0.419231		0.075	2.67	3.176	1.23	0.2521	0.75	0.71598	3.96668	0.7538	0.09106	0.85		1446	16	1451	9.6	1449.2	9.7	-0.2213		32	4.8	817	2.43		24.7					24	12.1	91	25.3	129	29	267	51	11320	3.4	65.4	156			40.3595
CC1801-138 S-13	199.9	59.5	0.297649		0.0751	3.33	3.179	0.629	0.2528	0.59	0.75146	3.9557	0.5933	0.09153	0.51		1456.6	9.8	1452.1	4.9	1452.9	7.6	0.254016		85	10	715	3.23	0.00441	15.8	0.0346	3	1.2	0	22	5.1	60.7	21.4	138	25.1	250	52.3	12280	1.1	59.5	199.9		0.0186076	25.7749
CC1801-138 S-7	102.6	36.2	0.352827		0.0815	6.13	3.194	1.6	0.2535	0.87	0.70564	3.94477	0.8677	0.09154	1		1460	20	1455	12	1457	11	0.205479		123	43	1101	1.29	0.0003	8.5	0.0355	10.1	5.8	1.7	48	9.9	114	40.5	183	31.3	259	49.8	9860	0.8	36.2	102.6		0.00126582	13.8662
CC1801-138 S-75	145.3	58.5	0.402615		0.0768	3.13	3.262	1.07	0.2542	0.59	0.77262	3.93391	0.59	0.09231	0.65		1475	13	1471.9	8.4	1460.1	7.5	1.01017		68		832	2.25	0.001412	34.5			6.4	3.4	6.9	9.9	94	25.5	138	26.2	289	60.8	11570	3.6	58.5	145.3		0.00595781	56.3725
CC1801-138 S-36	192.1	77.8	0.404997		0.0764	2.88	3.186	1	0.2547	0.79	0.65823	3.92619	0.7852	0.09026	0.64		1430	12	1453.5	7.7	1462	10	-2.23776		109		898	3.51	0.0061	34		2.2	6.4	1.14	9.9	5.3	80	33.6	155	35.3	294	54.5	11760	2.3	77.8	192.1		0.0257384	55.4649
CC1801-138 S-39	109.6	68	0.620438		0.0787	2.8	3.19	1.25	0.2545	1.1	0.68364	3.92927	1.061	0.09059	0.97		1436	19	1454.4	9.7	1462	14	-1.81058		157		989	2.97	0.00535	55.8	0.0511	6.4	12	0.81	37	7.5	101	29.9	177	32.1	269	53.8	10610	0.99	68	109.6		0.0225738	91.0277
CC1801-138 S-30	96	68.6	0.714583		0.0754	2.79	3.17	1.32	0.2548	1.3	0.73301	3.92465	1.256	0.09028	0.91		1430	17	1449	10	1463	16	-2.30769		600	6	1236	1.49		61		139	17.8	2.1	51	10.6	127	40	201	38.2	346	62.4	9490	0.48	68.6	96			99.5106
CC1801-138 S-19	128.3	63.9	0.498051		0.0774	3.75	3.215	1.06	0.2548	0.75	0.54682	3.92465	0.7458	0.09239	0.89		1474	17	1462.3	8.6	1463	9.7	0.746269		920	6	599	1.63		158		98	15.6	1.6	11.6	4.9	70	19.1	107	21.8	235	45.6	10350	0.14	63.9	128.3			257.749
CC1801-138 S-2	133.3	62.4	0.468117		0.079	4.3	3.264	0.98	0.2571	0.97	0.66089	3.88954	0.9724	0.09189	0.71		1464	14	1472.3	7.5	1475	13	-0.751366		106	17	1100	1.69	0.00504	20.6		3.4	15.4	2.1	34	11.4	102	37.6	190	35.6	313	60.1	10330	0.47	62.4	133.3		0.0212658	33.6052
CC1801-138 S-23	71	33.4	0.470423		0.0771	5.58	3.217	1.49	0.2577	1.2	0.81683	3.88048	1.242	0.09089	0.87		1443	17	1461	12	1478	17	-2.4255		112	49	696	0.95	0.00444	17	0.0378	4.6	3.2	0.89	24.1	5.2	72	22.3	123	21.7	211	44.9	10150	0.7	33.4	71		0.0187342	27.7325
CC1801-138 S-43	118	89.7	0.760169		0.0802	3.87	3.78	3.704	0.261	4.21	0.9742	3.83142	4.2146	0.10556	0.87		1723	16	1585	29	1492	54	13.4068
CC1801-138 S-66	3580	97	0.027095		0.0358	6.15	3.35	3.284	0.262	2.9	0.91736	3.81679	2.9009	0.09334	1		1493	19	1490	26	1499	39	-0.401875
CC1801-138 S-44	609	131.3	0.215599		0.0532	3.57	4.149	0.578	0.2739	0.66	0.90235	3.65097	0.6571	0.10893	0.26		1780.8	4.6	1663.9	4.8	1560.8	9.1	12.354		223	16	1590	1.72		18.2		15	18.5	5.8	89	19.3	196	50.5	229	38.5	313	61	14140	0.9	131.3	609			29.69
CC1801-138 S-64	222.8	59.3	0.266158		0.0382	4.71	3.534	2.49	0.2778	1.9	0.8464	3.59971	1.872	0.0935	1.39		1496	25	1534	20	1580	26	-5.61497
CC1801-138 S-67		65.9			0.0428	4.91	3.69	2.2	0.2791	1.8	0.82875	3.58295	1.792	0.0967	1.34		1559	25	1568	18	1587	25	-1.79602
CC1801-138 S-65	525	40.4	0.0769524		0.0471	5.73	3.593	1.56	0.2799	1.8	0.71028	3.57271	1.822	0.0941	1.38		1507	26	1547	12	1591	26	-5.57399
CC1801-138 M-17	597	260	0.435511		0.0955	3.87	4.12	3.155	0.2814	2.3	0.97326	3.55366	2.345	0.10562	0.6		1724	11	1656	25	1598	33	7.30858		85	2	842	1.1	0.0347	19.7				3.6	3.5	4.5	75	20.5	106	24.4	277	53	9960	0	260	597		0.146414	32.1895
CC1801-138 S 53 8/19/2019 8:59:27 PM (Run: 1)	238.159	200.346	0.841228		0.073849	3.40097	4.3652	2.90736	0.283173	2.38829	0.786613	3.53142	2.38829	0.111802	1.65794		1828.92	30.0568	1705.78	24.0185	1607.32	33.976	12.1163		192.695	16.0624	1286.99	1.58343		15.7586	0.234653	2.59159	6.09343	1.37321	34.4489	11.6738	125.684	43.963	189.145	39.8887	352.662	50.6563	12327.3	1.18884	200.346	238.159		0.0618811	25.7493
CC1801-138 S 63 8/19/2019 9:27:04 PM (Run: 1)	99.8794	170.963	1.7117		0.0779178	4.35959	4.03869	3.85589	0.284897	1.30873	0.291605	3.51004	1.30873	0.102814	3.627		1675.53	67.0222	1642.02	31.3818	1615.98	18.7063	3.55438		285.835	27.4761	2750.66	3.52075	0.226118	34.528	0.716169	11.757	22.0861	4.41876	83.8977	28.1231	295.947	99.3072	396.973	90.1749	825.501	105.666	8840.68	1.22473	170.963	99.8794		0.954083	56.4184
CC1801-138 S-25	416	143.7	0.345433		0.0831	1.93	4.346	2.02	0.2897	2	0.98231	3.45185	2.002	0.10984	0.34		1795.8	6.1	1701	17	1640	29	8.6758		390	27	2180	1.59	0.00421	11.9		54	42	9.9	98	23.7	232	68.6	301	52.8	486	90	12300	0.08	143.7	416		0.0177637	19.4127
CC1801-138 M-6	203	79.6	0.392118		0.0901	2.77	4.242	1.32	0.2939	1.1	0.87597	3.40252	1.089	0.10502	0.58		1714	11	1684	10	1661	16	3.09218		40	5.7	227	0.23	0.00443	14.6	0.2			5.5	8.9	2.5	16.2	7.8	29.8	7.5	104	21.8	10180	0	79.6	203		0.018692	23.8562
CC1801-138 S 58 8/19/2019 9:09:13 PM (Run: 1)	54.8731	50.8964	0.927528		0.0787789	7.09927	4.26073	4.84123	0.296255	3.87498	0.787528	3.37548	3.87498	0.104308	2.90208		1702.15	53.4457	1685.81	39.8129	1672.71	57.0903	1.72978		127.567	26.2087	1125.72	1.44822		8.18188	0.134301	4.59243	10.1314	1.515	37.9107	13.0414	129.829	41.7323	160.423	34.7852	334.854	44.0417	8692.37	0.505713	50.8964	54.8731		0.0354169	13.3691
CC1801-138 S-33	190	92.4	0.486316		0.0892	3.03	4.245	1.04	0.2962	0.78	0.92416	3.3761	0.7766	0.10386	0.51		1693.2	9.5	1682.5	8.4	1673	11	1.19301		145	19	1350	2.35	0.00587	14.5	0.053	7.3	6.3	0.33	40	9.9	142	47.5	255	41.6	409	83	11600	0.33	92.4	190		0.0247679	23.6542
CC1801-138 S 65 8/19/2019 9:30:58 PM (Run: 1)	249.703	133.144	0.533208		0.0844213	5.27082	4.34989	3.47492	0.298115	3.10102	0.870021	3.35441	3.10102	0.105826	1.56804		1728.72	28.7812	1702.87	28.6885	1681.95	45.9085	2.70525		490.381	9.8518	2269.89	0.914898		7.70611	0.177737	4.09291	10.5058	1.4469	49.1466	18.9329	229.785	81.5328	347.155	81.0179	796.497	101.115	9928.75	0.692329	133.144	249.703		0.0468716	12.5917
CC1801-138 XS 70 8/19/2019 9:40:46 PM (Run: 1)	319.036	249.831	0.783081		0.0865892	2.82458	4.35818	2.40632	0.298938	1.67572	0.636627	3.34517	1.67572	0.105736	1.72695		1727.15	31.7042	1704.45	19.8734	1686.04	24.8606	2.38042		178.171	15.5093	1609.96	1.8255		32.8855	0.14269	3.69406	9.00733	1.51022	38.8083	13.4048	151.602	54.9334	234.791	57.681	573.682	70.933	10325.6	0.813385	249.831	319.036		0.0376293	53.7345
CC1801-138 S-77	69.1	37.1	0.536903		0.0905	3.98	4.441	1.1	0.3001	0.73	0.7672	3.33222	0.7331	0.10558	0.73		1723	13	1719.7	9.1	1692	11	1.79919		38	3.9	543	1.34	0.002017	10.7	0.16				21.7	8.5	69	24.2	80	17.1	162	35.1	10000	2.8	37.1	69.1		0.00851055	17.4837
CC1801-138 S-1	42	64.2	1.52857		0.0857	2.22	4.37	2.517	0.2997	1.4	0.82735	3.33667	1.435	0.1051	1.33		1714	25	1705	20	1695	23	1.10852		143	43	1171	1.83	0.00469	35.9		15.7	15.2	4.2	63	12.7	121	38.5	184	34.7	281	53.2	9900	0.31	64.2	42		0.019789	58.5644
CC1801-138 S 56 8/19/2019 9:05:19 PM (Run: 1)	67.6083	57.5101	0.850637		0.0733799	5.7907	4.33348	4.42976	0.301557	3.10014	0.682235	3.31612	3.10014	0.104224	3.16416		1700.65	58.2836	1699.75	36.5457	1699.02	46.3026	0.0958381		251.114	33.2224	1017.83	1.70548	0.0358299	10.296	0.423763	6.25809	9.21817	2.00178	36.7774	10.5273	112.015	36.1971	143.437	30.8823	296.213	41.0542	10053.1	0.966894	57.5101	67.6083		0.151181	16.8236
CC1801-138 S-32	270.5	81.9	0.302773		0.0887	2.71	4.384	0.547	0.3023	0.53	0.6448	3.30797	0.5293	0.1049	0.52		1711.5	9.6	1709.2	4.6	1702.5	7.7	0.525855		86	17	1060	2.51	0.00462	8.7	0.0406	12	1.8	0	25	7.5	105	37.1	191	36.7	344	62	11600	1.66	81.9	270.5		0.0194937	14.1925
CC1801-138 S-54	68.5	43.8	0.639416		0.0956	4.29	4.353	1.45	0.3025	1.2	0.67204	3.30579	1.157	0.1051	1.14		1713	21	1705	12	1703	17	0.583771		199	14	970	0.55	0.00486	4.5	0.024	8	1.9	0.29	32	6.7	83	38.5	168	33.8	293	62.8	11840	0.41	43.8	68.5		0.0205063	7.34095
CC1801-138 S 60 8/19/2019 9:13:07 PM (Run: 1)	168.242	84.9303	0.504811		0.083192	5.38251	4.53505	3.32704	0.302943	2.19846	0.627758	3.30095	2.19846	0.108572	2.49719		1775.6	45.5687	1737.42	27.6789	1705.89	32.9514	3.92631		124.119	11.7025	977.056	2.93957		10.7471	0.349838	6.59912	12.0016	1.42768	37.4108	11.7429	117.025	38.5086	148.882	30.708	290.814	34.1895	9085.88	1.70504	84.9303	168.242		0.0922569	17.5606
CC1801-138 S 45 8/19/2019 8:35:51 PM (Run: 1)	112.029	107.548	0.960007		0.0740505	4.89288	4.08623	4.05173	0.302964	2.634	0.627338	3.30072	2.634	0.0978207	3.07873		1582.97	57.575	1651.56	33.052	1705.99	39.4814	-7.77136		352.087	28.0635	2164.27	0.963805		6.18103	0.282998	5.29225	14.5989	2.02779	65.479	20.3626	230.301	78.2731	310.319	68.3563	630.958	88.7175	11369.1	0.793487	107.548	112.029		0.0746302	10.0997
CC1801-138 S-57	321	256	0.797508		0.0886	1.58	4.354	0.919	0.3031	0.69	0.73729	3.29924	0.6929	0.10463	0.49		1706.8	9	1703.5	7.6	1706	11	0.0468713		93	7	1209	3.9	0.0043	33.2	0.0454	3.9	5.6	0.65	51	9.3	108	37.4	206	35.5	338	65.4	11160	1.92	256	321		0.0181435	54.1599
CC1801-138 S-34	51.4	58.3	1.13424		0.0871	3.33	4.39	2.28	0.3039	2.1	0.88057	3.29056	2.073	0.1044	1.05		1701	20	1710	19	1710	31	-0.529101		135	46	1250	1.63	0.00638	22.4		16	13	1.46	61	16	148	44.9	227	36.4	309	60.1	10850	0.6	58.3	51.4		0.0269198	36.5416
CC1801-138 S 52 8/19/2019 8:57:30 PM (Run: 1)	66.5229	71.4574	1.07418		0.0777274	5.51262	4.12108	6.44708	0.304537	3.09722	0.468283	3.28368	3.09722	0.0981454	5.65439		1589.19	105.655	1658.49	52.6796	1713.77	46.6093	-7.83903		422.559	36.7287	1982.62	0.819145		4.88699	0.132728	5.66891	12.3035	1.97256	56.3355	17.8472	206.207	69.5869	294.952	66.1903	628.51	91.1765	11347	0.43191	71.4574	66.5229		0.0350021	7.98528
CC1801-138 S-53	78.6	25.9	0.329517		0.093	11.83	4.344	1.38	0.3046	1.1	0.78442	3.28299	1.051	0.1033	0.84		1683	16	1701	11	1714	16	-1.84195		103		1267	4.31	0.00503	15	0.051	11.8	16.8	0	43	9.5	123	47.2	218	35.9	373	68.6	9560	0.7	25.9	78.6		0.0212236	24.4698
CC1801-138 S-35	168.4	62.6	0.371734		0.0927	4.85	4.427	1.04	0.3046	0.98	0.87253	3.28299	0.9848	0.10486	0.59		1711	11	1719	9	1714	15	-0.175336		105	6	844	1.2		9.3	0.029	10	7.5	0	21	7.3	91	31.7	152	34.5	296	53.4	13580	0.74	62.6	168.4			15.1713
CC1801-138 S-58	170.1	84	0.493827		0.09	3.22	4.325	1.02	0.3048	0.72	0.70252	3.28084	0.7218	0.10311	0.78		1679	14	1697.9	8.4	1715	11	-2.14413		49	19	758	0.63	0.00419	17.2	0.0447	20	11.5	1.18	43	7.9	78	23.3	105	19.6	183	37.1	10370	0.4	84	170.1		0.0176793	28.0587
CC1801-138 S-76	93.6	68.9	0.736111		0.0886	2.93	4.477	0.938	0.3053	0.56	0.65398	3.27547	0.5569	0.10594	0.73		1729	13	1726.6	7.8	1717.6	8.6	0.659341		38	0.4	682	1.23	0.001933	12.8			7	2.6	12.5	9.3	76	26.6	82	22.1	199	37.7	10600	3.4	68.9	93.6		0.00815612	20.915
CC1801-138 S-14	179.1	117	0.653266		0.0895	2.35	4.458	0.718	0.3059	0.52	0.84507	3.26904	0.5231	0.10633	0.53		1736.4	9.8	1723.1	5.9	1720.3	8.1	0.927206		121	17	1830	1.16	0.00411	17.3		38	30	3.1	78	20.1	197	57.1	279	46.4	396	75.1	10920	0.56	117	179.1		0.0173418	28.2219
CC1801-138 S-17	332	139.9	0.421386		0.092	2.07	4.466	0.896	0.3062	0.75	0.85967	3.26584	0.7511	0.10689	0.51		1747.7	9	1726.2	7.9	1722	11	1.4705		297	9	2270	0.89	0.0004	9.1	0.0363	11.7	18.8	1.09	75	18.6	256	79.6	457	77.9	647	125	10580	0.64	139.9	332		0.00168776	14.845
CC1801-138 S-31	500	47.1	0.0942		0.0895	4.13	4.665	0.686	0.3072	0.65	0.8683	3.25521	0.651	0.11017	0.34		1801.3	6.3	1760.9	5.8	1727	9.6	4.1248		223	31	1430	0.74	0.00449	2.18	0.0402	1.5	3.3	0.57	17.6	9	133	43.8	226	36.3	305	52.7	13950	1.19	47.1	500		0.0189451	3.55628
CC1801-138 S 48 8/19/2019 8:41:41 PM (Run: 1)	247.925	169.425	0.683371		0.077658	4.40101	4.54565	3.22772	0.307287	2.43304	0.722902	3.25429	2.43304	0.107288	2.12096		1753.84	38.8083	1739.36	26.8639	1727.34	36.8672	1.5107		236.181	23.7323	1511.28	1.697		11.5061	0.167438	3.37295	9.40043	1.05499	39.5519	14.2762	151.614	53.0428	206.434	45.2268	411.15	57.1563	11525.8	1.28009	169.425	247.925		0.0441555	18.8008
CC1801-138 M-9	112.9	57.4	0.508415		0.0955	4.71	4.452	1.37	0.3076	1.1	0.82366	3.25097	1.138	0.10453	0.77		1705	14	1724	11	1729	17	-1.40762		55	9.9	534	0.9	0.00763	12.5			4.1	2.8	17.4	8.8	53	19	81	16.2	183	25.9	9720	1.7	57.4	112.9		0.0321941	20.4248
CC1801-138 S 59 8/19/2019 9:11:10 PM (Run: 1)	177.65	119.619	0.673341		0.0821045	3.69933	4.4467	2.71504	0.307682	1.8617	0.63789	3.25011	1.8617	0.104818	1.97624		1711.1	36.3545	1721.09	22.5066	1729.29	28.2376	-1.06283		507.088	17.4316	2169.72	1.5938		7.13185	0.111478	2.64208	8.80046	0.687506	44.8066	17.7909	209.908	82.3613	355.629	84.4201	844.241	115.81	11623.4	0.706235	119.619	177.65		0.0293983	11.6533
CC1801-138 S 61 8/19/2019 9:23:09 PM (Run: 1)	46.8678	38.3159	0.817533		0.0935096	9.51211	4.78541	5.63221	0.308065	3.5195	0.612713	3.24607	3.5195	0.112662	4.39715		1842.79	79.5813	1782.34	47.3036	1731.18	53.4333	6.05662		176.801	28.8099	1207.95	1.5666		5.98767	0.470045	7.27319	13.8855	2.08224	52.411	16.3543	150.94	43.6326	167.668	34.7908	306.99	37.3815	8827.82	0.940939	38.3159	46.8678		0.123957	9.78377
CC1801-138 S-15	315	40.6	0.128889		0.0898	4.9	4.516	0.819	0.3086	0.65	0.89571	3.24044	0.6481	0.10666	0.37		1742.1	6.8	1733.8	6.8	1734	10	0.464956		117	25	880	1.01	0.0044	3.3	0.0357	3.1	0	0	12.3	4.6	65	29.1	174	35.9	336	62.2	13430	1.61	40.6	315		0.0185654	5.38336
CC1801-138 M-1	81.8	63.3	0.773839		0.0886	3.84	4.51	2.22	0.3099	1.5	0.9123	3.22685	1.549	0.1057	0.946		1724	18	1731	19	1740	24	-0.928074		29	15.6	1086	0.63	0.00582	11.7	0.35		3.9	6.7	52	19.9	155	38.8	151	27.1	295	52.1	10440	0	63.3	81.8		0.024557	19.1176
CC1801-138 S-9	331	114.3	0.345317		0.094	1.81	4.714	0.679	0.311	0.58	0.75983	3.21543	0.5788	0.11028	0.45		1803	8.3	1770.8	5.4	1745.5	8.6	3.18913		205	24	1440	1.77	0.00432	4		8.6	10.7	0.83	52	12	131	47.1	236	43.2	391	67	11820	1.49	114.3	331		0.0182278	6.52529
CC1801-138 S-24	293	40.7	0.138908		0.0936	5.24	4.523	0.951	0.3127	0.7	0.8615	3.19795	0.7036	0.1058	0.53		1729	10	1734.9	7.9	1754	11	-1.44592		933	16	3740	3.18	0.00431	7.1	0.0371	4.8	8	0.5	55	19.3	308	121	697	161	1570	311	12090	2.26	40.7	293		0.0181857	11.5824
CC1801-138 M-5	256	251	0.980469		0.0969	1.96	4.71	0.913	0.313	0.99	0.73286	3.19489	0.9903	0.10939	0.48		1788.3	8.9	1768.7	7.7	1755	15	1.8621		134	7.5	1360	0.67		10.5	0.07		20	5.4	44	23.2	172	57	185	40.2	397	74	12780	6.6	251	256			17.1569
CC1801-138 S-29	348.2	81.5	0.234061		0.0976	3.28	4.747	0.674	0.3134	0.64	0.91661	3.19081	0.6381	0.11009	0.28		1800	5.1	1775.4	5.7	1757.5	9.7	2.36111		152	24	735	1.3	0.00428	3.48		3.2	4	0	24.3	4.7	73	21.6	142	27.6	254	50	12520	2.4	81.5	348.2		0.0180591	5.677
CC1801-138 S-18	510	54.8	0.107451		0.0954	2.52	4.797	0.75	0.3141	0.73	0.91723	3.1837	0.7322	0.1113	0.34		1819.8	6.2	1784.2	6.3	1761	11	3.23112		289	13	1523	0.89	0.0045	2.1	0.037	0	7.9	0.7	41	10.5	140	44.8	247	37.3	279	49.9	13490	0.19	54.8	510		0.0189873	3.42577
CC1801-138 S 50 8/19/2019 8:45:35 PM (Run: 1)	192.39	119.335	0.620276		0.0727411	5.75257	4.61677	2.56618	0.314999	1.90381	0.692254	3.17462	1.90381	0.106299	1.7207		1736.88	31.5511	1752.3	21.4175	1765.26	29.3985	-1.63377		390.458	22.645	1593.03	0.743878	0.032928	2.40001	0.294735	8.02298	14.8253	0.43597	60.1462	19.7539	190.363	58.0825	212.313	43.3813	387.505	55.4628	11936.7	0.470427	119.335	192.39		0.138937	3.92159
CC1801-138 M-10	445	197.6	0.444045		0.0979	2.04	4.811	0.915	0.3156	0.63	0.86751	3.16857	0.6337	0.11054	0.3		1807.4	5.4	1786.6	7.7	1768.2	9.7	2.16886		102	6.8	1237	1.86	0.01013	7.4	0.3		4.4		33	13.4	146	55.6	204	43.2	419	71.6	12660	3	197.6	445		0.0427426	12.0915
CC1801-138 S 55 8/19/2019 9:03:22 PM (Run: 1)	36.4379	37.4145	1.0268		0.0794414	8.22744	4.57014	6.30112	0.316512	2.95452	0.455895	3.15944	2.95452	0.104722	5.56552		1709.45	102.402	1743.84	52.4942	1772.67	45.7899	-3.69854		214.815	46.2729	1053.99	1.8713	0.275034	7.15758	0.620724	11.2535	12.5562	1.92784	46.2929	13.0904	132.104	39.4369	134.918	29.8649	259.473	35.5157	9773.48	0.879135	37.4145	36.4379		1.16048	11.6954
CC1801-138 M-13	260	101.6	0.390769		0.0935	2.67	4.727	0.91	0.3171	0.66	0.58294	3.15358	0.6621	0.10773	0.73		1760	13	1771.8	7.6	1775	10	-0.852273		41	13.5	583	2.8	0.01217	16.4					25	5.9	63	23.8	83	17.9	146	38.3	11720	5.1	101.6	260		0.0513502	26.7974
CC1801-138 M-22	319	150.2	0.470846		0.098	2.45	4.806	0.832	0.3171	0.63	0.74715	3.15358	0.6307	0.10987	0.54		1796.2	9.7	1785.9	7	1775.6	9.7	1.14687		78	7	747	1.73	0.0165	6.9					11.4	12.4	96	26.4	115	28.3	236	50.8	13130	0	150.2	319		0.0696203	11.2745
CC1801-138 S-47	271.2	268.6	0.990413		0.0935	1.6	4.822	0.643	0.3176	0.6	0.84883	3.14861	0.5984	0.10963	0.46		1792.4	8.3	1788.6	5.5	1779.8	9.8	0.702968		164	42	1760	1.26	0.00422	8.2	0.0424	37	6.7	0.23	68	13.6	164	59.5	305	49	444	85.4	11640	0.29	268.6	271.2		0.0178059	13.3768
CC1801-138 M-8	154.8	53	0.342377		0.0922	3.15	4.76	0.84	0.3189	0.72	0.78552	3.13578	0.7214	0.10834	0.38		1770.7	7	1777.8	7.1	1784	11	-0.751115		103	5.2	692	0.99	0.00473	4.7					20.5	10.1	78	22.7	100	20.2	208	37.7	11210	1	53	154.8		0.0199578	7.67974
CC1801-138 S-79	168.7	54.1	0.320688		0.0929	4.74	4.821	1.18	0.3194	0.78	0.77947	3.13087	0.7828	0.10935	0.5		1787.6	9.1	1788.1	9.9	1787	12	0.0335646		53	4.7	545	0.64	0.0035	4.9					6.1	3.7	77	16.8	80	16.3	180	33.9	11650	4	54.1	168.7		0.0147679	8.00654
CC1801-138 S-38	253.8	70.9	0.279354		0.0929	2.58	4.848	0.846	0.3209	0.59	0.84766	3.11624	0.5921	0.10877	0.38		1778	6.8	1794.4	6.9	1794.2	9.2	-0.911136		163	30	798	0.94	0.0056	3.5	0.0523	1.9	3.1		22.4	5.2	83	26.4	155	26.1	264	52.7	13680	0.39	70.9	253.8		0.0236287	5.70962
CC1801-138 S-37	122.9	82	0.667209		0.0928	2.48	4.836	0.806	0.3214	0.68	0.73331	3.11139	0.6846	0.10817	0.59		1768	11	1791.1	6.8	1796	11	-1.58371		87	35	625	0.78	0.00666	4.7	0.02		1.1		13.5	6.6	61	20.1	118	22	173	32.4	13100	0.38	82	122.9		0.0281013	7.66721
CC1801-138 S-22	243.8	89	0.365053		0.0933	3	4.813	0.893	0.3219	0.78	0.77809	3.10656	0.7767	0.10941	0.58		1789	10	1787	7.6	1801	12	-0.670766		94	33	941	1.09	0.00393	6.4	0.0337		3.9		26	5.7	84	31.7	156	27.9	226	47.2	11430	0.06	89	243.8		0.0165823	10.4405
CC1801-138 S 64 8/19/2019 9:29:01 PM (Run: 1)	156.824	151.701	0.96733		0.0890658	3.5658	5.14018	4.09025	0.327598	3.55026	0.851371	3.05252	3.55026	0.113798	2.03121		1860.94	36.6807	1842.77	34.7678	1826.73	56.4746	1.83854		169.087	28.3663	827.112	0.880962	0.285101	31.8526	1.26895	15.6818	18.3796	3.34848	46.0481	10.9294	106.365	28.4675	101.212	22.7594	209.261	26.7634	7794.13	0.606837	151.701	156.824		1.20296	52.0467
CC1801-138 S-62	268.2	59.5	0.221849		0.0365	4.38	4.949	1.31	0.3391	1.1	0.86057	2.94898	1.091	0.10634	0.67		1736	12	1812	11	1882	18	-8.41014
CC1801-138 S-63	142.3	46.2	0.324666		0.0426	5.63	5.22	3.831	0.3547	2.6	0.86914	2.81928	2.594	0.1096	1.55		1791	29	1854	32	1957	44	-9.26857
CC1801-138 S-42	181.8	217.7	1.19747		0.1428	1.89	12.995	0.693	0.5134	0.76	0.88889	1.9478	0.7598	0.18179	0.31		2668.4	5.1	2679.1	6.5	2671	17	-0.0974367		49	22	894	0.91	0.00564	37.4	0.0552	19	9.3	0.91	46	6.7	85	28.7	144	21.9	238	46.6	12050	0.26	217.7	181.8		0.0237975	61.0114
Discordant data
CC1801-138 S-45	496	139.9	0.282056		0.0559	5.55	1.67	9.581	0.133	8.27	0.99751	7.5188	8.2707	0.08966	0.94		1417	18	995	58	817	67	42.343		490	47	4460	4.7		86		238	147	43.8	308	58	503	139	564	106	734	148	10770	3.3	139.9	496			140.294
CC1801-138 S-6	770	148	0.192208		0.0547	6.58	1.72	8.721	0.138	7.97	0.99854	7.24638	7.971	0.0899	0.88		1422	17	1005	54	831	62	41.5612		390	103	3960	4.5		53		301	101	44	195	42	405	121	524	83	730	126	10820	1.01	148	770			86.46
CC1801-138 S-60	63	89.2	1.41587		0.0251	3	3.041	2.89	0.2634	2.4	0.86796	3.79651	2.354	0.0844	1.3		1299	26	1416	22	1507	32	-16.0123
CC1801-138 S-46	720	229	0.318056		0.0852	3.76	3.23	8.05	0.227	7.05	0.99717	4.40529	7.0483	0.10223	0.91		1663	17	1449	61	1313	86	21.0463		460	101	4860	2.47		103		370	141	40	247	56	560	168	790	117	1010	159	10720	0.73	229	720			168.026
CC1801-138 S-74	340	69.3	0.203824		0.0787	5.34	3.71	5.93	0.252	5.56	0.99677	3.96825	5.5556	0.10508	0.54		1715	10	1565	46	1447	69	15.6268		134	5	1430	2.74	0.001248	11.4	0.37		56	53	104	36.6	221	53	171	31.8	257	45.8	11950	7.8	69.3	340		0.00526582	18.6275
CC1801-138 S-73	258	94.9	0.367829		0.1273	3.46	5.283	1.51	0.2988	0.8	0.39139	3.34672	0.8032	0.1272	1.34		2057	23	1865	13	1685	12	18.0846		74		1090	1.56	0.000993	15.1	0.21		9	25	40	24.3	174	39.8	145	33.5	290	58.8	11010	4.8	94.9	258		0.00418987	24.6732
Jan 6th, 2019 - UC Santa Barbara
Laser Ablation used a laser spot size of 25 microns
Bold indicates preferred date
Bold Italics indicateds zircon trace element ratios used in Fig. S4
Aug 19th, 2019 Experiment 1 - Boise State University
Isotope ratio and date errors include systematic calibration errors of 0.70% (207Pb/206Pb) and 0.85% (206Pb/238U) (all 2-sigma).
Isotope ratios and ages corrected using a measured linear secondary standard age bias - 206Pb count rate relationship.
Trace element concentrations in ppm, calculated using mean count rate method.
Sweep-by-sweep downhole fractionation of U/Pb ratios NOT corrected via Si/Zr fractionation factor.
Ablation used a laser spot size of 15 microns, and a laser firing repetition rate of 10 Hz.
Bold indicates preferred date; Bold and Italics indicates zircon trace element ratios plotted in Fig. S4
[truncated: 24 more columns]

## Sheet: Standard Data
Table S2. LA-ICPMS U-Pb geochronologic analyses and trace element concentrations
Sample CC1801-138
					Corrected isotope ratios																				Concentrations (ppm)																							CI chondrite normalizing values from Sun & McDonough
	U	Th			208Pb*	±2s	207Pb*	±2s	206Pb*	±2s	error	238U	±2s	207Pb*	±2s		207Pb*	±2s	207Pb*	±2s	206Pb*	±2s																										0.237	0.612
Analysis	ppm	ppm	Th/U		232Th	(%)	235U*	(%)	238U	(%)	corr.	206Pb*	(%)	206Pb*	(%)		206Pb*	(Ma)	235U	(Ma)	238U*	(Ma)	% disc.		P	Ti	Y	Nb	La	Ce	Pr	Nd	Sm	Eu	Gd	Tb	Dy	Ho	Er	Tm	Yb	Lu	Hf	Ta	Th	U		La	Ce
PL 277 8/19/2019 6:29:36 PM (Run: 1)	604.686	58.7618	0.0971774		0.0159222	10.7814	0.406108	4.01136	0.0536392	2.56455	0.614993	18.6431	2.56455	0.0549108	3.08449		408.585	69.0076	346.068	11.7637	336.825	8.41628	17.563		267.718	76.4397	448.279	4.67654		1.7886	0.106946	1.55819	3.49537	0.865519	12.3308	5.20019	58.7923	14.9676	50.9328	10.3122	85.1099	6.70852	9637.02	3.05628	58.7618	604.686		0.028203	2.92255
PL 278 8/19/2019 6:31:33 PM (Run: 1)	652.298	65.7952	0.100867		0.0167059	11.8779	0.383257	4.22893	0.0538548	2.81678	0.645076	18.5684	2.81678	0.0516136	3.1543		268.354	72.3472	329.432	11.8973	338.145	9.27929	-26.0069		310.816	82.0641	512.178	4.78962		2.06564	0.074047	1.95061	3.25847	0.825751	13.5551	5.99198	65.5815	17.1486	57.0489	12.3226	96.2093	7.95993	9600.38	3.13405	65.7952	652.298		0.0195272	3.37522
PL 279 8/19/2019 6:33:30 PM (Run: 1)	687.362	70.3873	0.102402		0.0175725	10.3306	0.391929	4.82438	0.0528893	1.96556	0.38106	18.9074	1.96556	0.0537449	4.40582		360.376	99.4078	335.777	13.7931	332.236	6.36487	7.80846		331.756	81.4463	543.518	5.00117		1.8526	0.111792	2.07152	3.802	1.02193	15.2166	5.9009	65.4818	17.8804	58.4285	13.0135	102.81	8.79398	9678.11	4.08969	70.3873	687.362		0.029481	3.02713
PL 280 8/19/2019 6:35:27 PM (Run: 1)	670.728	67.7974	0.10108		0.0155656	13.0142	0.390002	4.76406	0.0534021	2.5948	0.524453	18.7258	2.5948	0.0529672	3.99541		327.37	90.6776	334.371	13.5725	335.375	8.47982	-2.44519		303.214	82.1645	528.613	5.03632		1.85294	0.116761	1.84024	5.22385	0.913383	15.9345	5.98612	66.3938	17.1652	58.7595	11.818	98.2102	7.6335	8839.4	3.30707	67.7974	670.728		0.0307915	3.02767
PL 285 8/19/2019 7:01:04 PM (Run: 1)	737.295	77.1654	0.10466		0.0190088	10.3496	0.397359	4.16341	0.0539265	2.76451	0.642462	18.5438	2.76451	0.0534416	3.11312		347.611	70.399	339.731	12.0214	338.583	9.1186	2.59721		293.948	90.5511	597.131	5.49405		1.82522	0.209594	1.87663	3.76865	1.28889	16.1866	6.96746	76.2708	19.828	62.2542	13.8411	114.4	8.84826	9690.77	3.27434	77.1654	737.295		0.0552728	2.98238
PL 286 8/19/2019 7:03:00 PM (Run: 1)	718.242	74.0339	0.103077		0.0159664	10.2384	0.411055	4.23771	0.0547248	2.25567	0.506366	18.2733	2.25567	0.0544772	3.58749		390.854	80.5097	349.635	12.5348	343.464	7.54465	12.1247		387.435	85.0235	564.87	5.7652		2.33466	0.15568	2.17203	3.69433	1.14043	15.5883	6.91003	73.0724	18.7672	61.681	13.031	102.501	8.6459	9814.34	2.99096	74.0339	718.242		0.0410547	3.8148
PL 289 8/19/2019 7:28:41 PM (Run: 1)	618.023	58.4637	0.0945981		0.0182834	8.40066	0.385667	4.79904	0.054484	2.68949	0.541347	18.354	2.68949	0.0513383	3.97459		256.068	91.364	331.199	13.5624	341.993	8.95814	-33.5553		302.005	74.6246	440.118	4.44211		1.96749	0.0780657	1.42176	3.77538	0.909797	12.0364	5.07226	56.6315	14.4263	49.3272	10.0678	84.4002	6.56923	9418.36	3.13929	58.4637	618.023		0.020587	3.21485
PL 290 8/19/2019 7:30:37 PM (Run: 1)	667.074	64.5368	0.0967461		0.0181187	10.8933	0.410238	4.88821	0.0547116	2.97558	0.591806	18.2777	2.97558	0.054382	3.87822		386.904	87.0953	349.046	14.4385	343.383	9.95028	11.2485		318.449	81.6587	494.48	4.94324		1.88981	0.131207	1.72818	4.05436	1.00772	13.6042	5.43356	62.9191	16.6384	53.2561	11.4028	91.7126	7.78565	9553.91	3.18305	64.5368	667.074		0.0346009	3.08793
PL 293 8/19/2019 7:56:12 PM (Run: 1)	722.409	74.0482	0.102502		0.0165078	11.7273	0.402419	4.42055	0.0544197	2.1515	0.460992	18.3757	2.1515	0.0536316	3.86164		355.59	87.2041	343.401	12.8797	341.599	7.15817	3.93447		353.827	90.2392	580.946	6.08579		2.15221	0.10457	2.83318	5.80829	0.969504	16.5814	6.37173	70.4376	19.1458	57.7311	12.2864	105.788	9.01228	9654.34	3.21167	74.0482	722.409		0.0275764	3.51669
PL 294 8/19/2019 7:58:10 PM (Run: 1)	728.827	76.2549	0.104627		0.0161578	9.75744	0.381559	5.28661	0.0538352	2.47525	0.449531	18.5752	2.47525	0.0514036	4.67134		259.001	107.323	328.184	14.8252	338.025	8.15138	-30.5112		334.365	88.2904	576.475	4.8347		2.28606	0.106803	2.74315	4.18962	1.08542	16.8404	6.65767	65.171	18.2392	62.931	13.1657	103.466	8.51833	9335.86	3.54003	76.2549	728.827		0.0281652	3.7354
PL 297 8/19/2019 8:23:54 PM (Run: 1)	724.803	75.9731	0.104819		0.0170578	9.21345	0.390591	5.5211	0.054663	2.72967	0.478261	18.2939	2.72967	0.0518236	4.79911		277.603	109.892	334.801	15.7463	343.086	9.12027	-23.589		286.44	88.1519	587.715	5.45229		2.22032	0.16469	2.23699	4.28498	1.52517	18.0474	6.56271	71.7524	18.7409	63.9128	13.3068	105.309	9.05766	9372.03	3.48656	75.9731	724.803		0.0434309	3.62798
PL 298 8/19/2019 8:25:51 PM (Run: 1)	579.891	56.6354	0.0976656		0.0179547	12.2292	0.391364	5.31359	0.0537596	2.87205	0.524572	18.6013	2.87205	0.0527987	4.47052		320.125	101.592	335.365	15.176	337.562	9.44551	-5.44712		245.88	72.2971	415.41	4.77068		1.42725	0.0867142	1.44553	3.189	0.835847	11.7427	4.72208	49.9769	12.985	44.7017	9.62379	79.4752	6.05086	9725.39	2.83678	56.6354	579.891		0.0228677	2.33211
PL 301 8/19/2019 8:47:37 PM (Run: 1)	703.131	73.2998	0.104248		0.0147706	10.487	0.40528	3.84868	0.0539274	2.92293	0.737915	18.5434	2.92293	0.054506	2.50376		391.991	56.1788	345.471	11.2703	338.589	9.64129	13.6233		305.059	88.6858	555.792	5.66954		1.8688	0.222401	1.80823	5.67962	1.26674	13.4337	6.02581	65.869	18.0484	62.1007	12.6291	105.245	8.35111	9801.23	3.71367	73.2998	703.131		0.0586499	3.0536
PL 302 8/19/2019 8:49:35 PM (Run: 1)	725.206	73.925	0.101937		0.0165964	11.4292	0.398402	5.09566	0.054658	2.36535	0.444084	18.2956	2.36535	0.0528647	4.51341		323	102.512	340.488	14.7407	343.056	7.90235	-6.20936		315.427	87.4062	583.555	5.03727		2.27207	0.143511	2.5939	4.16392	1.00381	16.4441	5.9751	70.1142	19.0567	61.3439	12.4072	110.923	8.3333	9484.31	3.91845	73.925	725.206		0.0378458	3.71253
PL 305 8/19/2019 9:15:11 PM (Run: 1)	749.795	78.8054	0.105103		0.0154987	7.5469	0.40023	4.04783	0.0533709	2.44941	0.580757	18.7368	2.44941	0.054388	3.22262		387.113	72.3708	341.815	11.7479	335.184	8.00025	13.4144		384.982	89.8815	577.871	5.36901		2.11061	0.21155	2.1043	6.19763	1.11257	15.2039	7.43498	71.7804	18.6624	61.8005	12.5057	108.86	9.09102	9794.64	3.61271	78.8054	749.795		0.0557884	3.44871
PL 306 8/19/2019 9:17:08 PM (Run: 1)	719.783	73.2731	0.101799		0.0167195	13.5319	0.390006	3.57589	0.0531171	1.47187	0.365729	18.8263	1.47187	0.0532519	3.25893		339.568	73.8012	334.374	10.1875	333.631	4.78571	1.74856		288.714	87.6416	567.255	4.99349		2.81426	0.0930721	1.78173	4.38983	1.18889	12.9413	6.35143	70.6068	17.7044	57.3162	11.5408	103.628	8.67875	9453.62	3.08737	73.2731	719.783		0.0245443	4.59846
PL 309 8/19/2019 9:42:53 PM (Run: 1)	660.14	65.575	0.0993349		0.0176993	11.1671	0.388431	4.77777	0.0522937	3.0903	0.630491	19.1228	3.0903	0.0538721	3.64378		365.71	82.1363	333.223	13.572	328.588	9.8999	10.1506		311.747	84.4341	474.826	4.49482		2.09389	0.160981	2.333	4.44983	0.977122	13.7876	5.20278	57.5266	16.3578	49.4907	10.8815	88.9137	7.46041	9580.63	3.03283	65.575	660.14		0.0424528	3.42139
PL 310 8/19/2019 9:44:51 PM (Run: 1)	709.041	70.1158	0.0988882		0.0165082	11.717	0.383703	4.70219	0.0531937	3.17632	0.65937	18.7992	3.17632	0.052316	3.46722		299.276	79.0838	329.759	13.2398	334.099	10.3417	-11.6359		248.246	86.0801	542.228	5.04487		2.08417	0.161346	1.50532	3.89192	0.845631	17.0346	6.37882	65.4919	17.4483	55.3653	12.1535	100.439	8.084	9922.31	3.46279	70.1158	709.041		0.0425492	3.4055
PL 313 8/19/2019 10:10:36 PM (Run: 1)	735.273	75.0716	0.1021		0.0184843	10.105	0.390105	5.1103	0.053387	2.16965	0.402864	18.7312	2.16965	0.0529961	4.62685		328.639	104.983	334.446	14.5616	335.282	7.08853	-2.02149		327.428	86.6606	584.384	5.32561		2.21723	0.230585	2.30403	4.89336	1.07602	17.5506	6.41444	71.7853	18.9379	59.2469	12.3666	108.138	8.67004	9824.08	4.02483	75.0716	735.273		0.0608082	3.62292
PL 314 8/19/2019 10:12:33 PM (Run: 1)	736.541	74.3731	0.100976		0.0179071	11.475	0.391006	3.92317	0.0550194	2.46447	0.6033	18.1754	2.46447	0.0515426	3.05248		265.146	70.0539	335.104	11.1975	345.264	8.28509	-30.2164		318.114	87.1174	571.127	5.17178		2.12797	0.121078	2.62774	4.57276	0.893036	17.0408	6.71299	66.212	18.6252	58.7292	11.4533	100.523	8.29042	9607.19	3.69406	74.3731	736.541		0.0319298	3.47708
PL 317 8/19/2019 10:38:18 PM (Run: 1)	739.371	74.8174	0.101191		0.0181227	10.5231	0.411507	4.05033	0.0542319	2.64857	0.631507	18.4393	2.64857	0.0550328	3.06435		413.552	68.4975	349.96	11.9899	340.451	8.78312	17.6764		379.942	92.0081	583.535	4.82135		2.2448	0.0476212	2.19534	4.50914	1.19066	14.8021	6.231	69.6492	19.0128	63.8622	12.2931	103.618	9.32372	9725.5	3.45053	74.8174	739.371		0.0125583	3.66798
PL 318 8/19/2019 10:40:15 PM (Run: 1)	534.343	49.5036	0.0926439		0.0127014	15.4599	0.402405	5.58902	0.0531141	2.89177	0.502528	18.8274	2.89177	0.054948	4.78277		410.106	106.974	343.391	16.2838	333.612	9.40191	18.6522		210.442	73.3387	367.03	4.24534		1.64469		1.23673	2.3242	0.502233	10.7025	4.55004	42.5655	11.5038	38.3774	8.02702	65.7121	5.78803	9657.35	2.74978	49.5036	534.343			2.68741
PL 321 8/19/2019 11:05:58 PM (Run: 1)	696.273	66.9085	0.0960952		0.0198553	12.0158	0.388417	4.84436	0.0540598	2.86783	0.574691	18.498	2.86783	0.0521102	3.90427		290.271	89.1967	333.212	13.7608	339.398	9.48159	-16.9244		304.615	86.0713	541.611	5.07015		1.67031	0.0885905	2.62544	4.69982	1.08292	12.9045	6.16605	64.5493	16.6559	56.8831	11.9147	96.0218	8.11527	9785.02	3.21805	66.9085	696.273		0.0233625	2.72927
PL 322 8/19/2019 11:07:56 PM (Run: 1)	711.135	70.8807	0.0996727		0.0165636	13.321	0.416397	4.9853	0.0545764	2.59775	0.502518	18.323	2.59775	0.0553352	4.25499		425.795	94.9086	353.471	14.8814	342.557	8.66646	19.5489		364.628	85.9532	572.152	5.42105	0.0197801	2.46285	0.123302	1.42223	5.14832	1.03353	16.2226	6.45575	64.9914	17.7179	61.0559	12.4725	103.987	8.08762	9552.51	3.84859	70.8807	711.135		0.0834602	4.02426
PL 325 8/19/2019 11:33:40 PM (Run: 1)	715.14	74.638	0.104368		0.016242	11.1531	0.401752	4.33622	0.0548874	2.44393	0.5409	18.2191	2.44393	0.0530866	3.5819		332.513	81.2173	342.918	12.6191	344.458	8.19733	-3.5923		378.079	88.4486	569.852	4.70114		2.49213	0.154063	1.77212	3.63695	0.899562	16.0189	6.82862	72.6228	17.7299	62.0848	12.022	104.466	8.52534	9619.14	3.33619	74.638	715.14		0.0406285	4.0721
PL 326 8/19/2019 11:35:37 PM (Run: 1)	737.602	73.8384	0.100106		0.0176704	9.9907	0.401411	5.29291	0.0547605	2.64394	0.482326	18.2613	2.64394	0.0531643	4.58525		335.789	103.909	342.671	15.3939	343.683	8.84878	-2.35067		386.116	91.4322	592.77	5.85445	0.0371384	2.4015	0.164467	1.84261	5.02784	0.899014	15.6944	6.42315	65.9769	18.4523	65.4756	12.1465	105.798	9.063	9748.12	3.58941	73.8384	737.602		0.156702	3.92402
PL 329 8/20/2019 12:01:22 AM (Run: 1)	608.706	58.1279	0.0954941		0.0177726	13.5715	0.380205	3.86979	0.0526564	2.80781	0.70338	18.9911	2.80781	0.0523679	2.66299		301.486	60.7176	327.189	10.8241	330.81	9.0542	-9.72642		177.276	78.6345	430.375	5.07405		1.6914	0.011604	2.06335	2.36028	0.889642	14.6633	4.92859	54.1881	14.4877	47.827	9.56737	82.0933	6.13807	9696.77	2.56891	58.1279	608.706		0.00306012	2.76372
PL 330 8/20/2019 12:03:20 AM (Run: 1)	644.788	63.4472	0.0984001		0.0175966	12.433	0.391964	5.19456	0.0551385	2.19804	0.40202	18.1362	2.19804	0.0515574	4.70661		265.803	108.003	335.803	14.8524	345.992	7.40454	-30.1686		290.655	81.3353	483.242	4.7989		2.48232	0.11525	2.06829	3.51635	0.793786	13.5026	5.49541	55.0204	16.6063	48.6279	10.4639	81.8498	6.886	9683.85	3.21954	63.4472	644.788		0.0303931	4.05609
PL 333 8/20/2019 12:40:46 AM (Run: 1)	732.013	73.5492	0.100475		0.015616	8.95533	0.385334	4.15939	0.0534405	2.33836	0.537283	18.7124	2.33836	0.0522957	3.43986		298.339	78.4748	330.956	11.7474	335.61	7.64697	-12.4926		345.04	90.6505	560.019	5.16843		2.3722	0.19068	1.47737	4.54993	0.996056	16.9475	6.50183	69.7648	18.3311	63.2311	12.7931	99.6566	8.24869	9527.55	3.43347	73.5492	732.013		0.0502848	3.87615
PL 334 8/20/2019 12:42:43 AM (Run: 1)	736.839	74.9939	0.101778		0.0166916	8.20616	0.408965	3.32031	0.0540159	2.16146	0.617221	18.5131	2.16146	0.0549115	2.52043		408.584	56.389	348.129	9.78576	339.13	7.14069	16.9987		394.465	90.3785	600.644	5.49887		2.49808		1.05662	3.63566	1.0677	14.8891	6.61245	72.5494	19.0163	60.9968	11.9551	104.065	7.92361	9879.84	3.82229	74.9939	736.839			4.08183
Seiland 341 8/19/2019 6:37:26 PM (Run: 1)	54.756	53.5454	0.977892		0.0270643	8.85692	0.653139	10.6692	0.0799609	2.91817	0.265495	12.5061	2.91817	0.0592415	10.2624		575.963	223.09	510.408	42.8014	495.89	13.9283	13.9025			2.63778	283.298	1.28103		3.03161	0.00927642	0.176488	0.337519	0.589294	4.52393	1.81481	25.7269	10.3866	51.1831	14.0059	153.592	21.3431	4618.73	1.09006	53.5454	54.756		0.00244631	4.95361
Seiland 342 8/19/2019 6:39:23 PM (Run: 1)	55.9613	55.2931	0.98806		0.0264975	8.43756	0.73098	9.02311	0.0873608	4.75591	0.521267	11.4468	4.75591	0.0606859	7.66797		628.105	165.241	557.128	38.6901	539.91	24.6318	14.0415		18.199	2.61081	275.894	1.46896		3.27858			0.760857	0.559914	3.57002	1.99573	25.7632	9.73852	49.4374	14.3074	152.514	20.0116	4718.42	1.15667	55.2931	55.9613			5.35715
Seiland 345 8/19/2019 7:32:36 PM (Run: 1)	59.9595	61.222	1.02106		0.028067	9.60602	0.71714	10.4858	0.0910107	3.93554	0.369361	10.9877	3.93554	0.0571493	9.71922		497.274	214.13	548.977	44.4661	561.512	21.1634	-12.9178			2.19376	281.536	1.42573		3.33524			0.430641	0.797283	4.77933	2.03719	27.3145	9.87997	48.9076	14.108	155.846	20.621	4741.61	0.929591	61.222	59.9595			5.44973
Seiland 346 8/19/2019 7:34:33 PM (Run: 1)	57.511	57.4871	0.999584		0.0222873	10.4205	0.66939	9.43702	0.0855605	3.56386	0.370337	11.6876	3.56386	0.056742	8.7382		481.508	193.038	520.342	38.4225	529.227	18.1075	-9.91038		40.3965	2.97862	279.617	1.45227		2.96779		0.35582	0.45399	0.758759	4.91234	2.15502	26.7621	9.36428	48.1735	13.8638	153.999	19.873	4658.77	1.20018	57.4871	57.511			4.84933
Seiland 349 8/19/2019 9:19:08 PM (Run: 1)	56.3342	54.4713	0.96693		0.0266189	11.2768	0.65225	9.01066	0.0846955	3.02414	0.326758	11.807	3.02414	0.0558537	8.48803		446.588	188.642	509.862	36.1181	524.089	15.2221	-17.3541		0.350814	2.46143	288.733	1.45522		3.00399		0.434815	0.590306	0.758625	3.99097	1.99629	25.3842	10.0939	46.3772	12.9612	149.106	21.133	4782.36	1.119	54.4713	56.3342			4.90849
Seiland 350 8/19/2019 9:21:05 PM (Run: 1)	56.6941	55.3528	0.976342		0.024716	12.6342	0.68919	11.8437	0.0886619	5.59566	0.468816	11.2788	5.59566	0.0563768	10.4385		467.234	231.167	532.313	49.0658	547.618	29.3774	-17.2044		43.7998	1.69753	292.751	1.46424		3.61306			0.256866	0.601314	3.787	1.74554	24.2011	10.6036	50.5168	13.8757	160.078	21.2014	4735.26	1.02974	55.3528	56.6941			5.90369
Seiland 353 8/19/2019 10:14:33 PM (Run: 1)	58.2461	56.4308	0.968835		0.0292851	10.4922	0.705957	10.3235	0.0842012	3.87022	0.368873	11.8763	3.87022	0.0608078	9.57059		632.426	206.093	542.343	43.3778	521.151	19.3759	17.595		92.3028	1.83185	290.604	1.48013		3.16131		0.347676	1.09446	0.492221	4.7051	1.84741	26.2176	10.0191	51.9668	13.8004	149.669	20.7456	4849.83	1.01441	56.4308	58.2461			5.16554
Seiland 354 8/19/2019 10:16:30 PM (Run: 1)	58.3809	59.1116	1.01252		0.0227027	11.6557	0.666525	10.7591	0.0856249	4.12457	0.377935	11.6788	4.12457	0.0564566	9.93716		470.372	219.944	518.597	43.693	529.61	20.9709	-12.594		24.9627	2.73734	284.3	1.13321		2.95821	0.0106935		1.00389	0.691143	2.84765	2.17607	26.7265	9.87206	50.1269	13.9739	157.391	20.2734	4655.64	1.1269	59.1116	58.3809		0.00282001	4.83367
Seiland 357 8/19/2019 11:09:55 PM (Run: 1)	59.0434	57.614	0.975791		0.0229481	11.523	0.597111	9.2283	0.0807902	3.11864	0.32959	12.3777	3.11864	0.0536037	8.68536		354.457	196.17	475.399	35.0325	500.838	15.028	-41.2971		89.7984	2.61286	276.876	1.25527		3.10134			0.505555	0.541981	4.20617	1.77527	27.8966	11.1587	47.5781	13.2756	152.561	20.668	4864.45	1.28374	57.614	59.0434			5.06754
Seiland 358 8/19/2019 11:11:52 PM (Run: 1)	58.5989	58.4975	0.99827		0.0254144	10.4533	0.640253	10.8602	0.0835629	2.83616	0.253345	11.967	2.83616	0.0555696	10.4834		435.245	233.446	502.463	43.0437	517.354	14.0997	-18.8649		18.9327	3.36118	300.446	1.53023		3.49236			0.622544	0.756702	4.70174	2.20163	26.9294	11.0664	54.2201	15.0077	165.281	22.403	4971.16	0.89913	58.4975	58.5989			5.70648
FC1 366 8/19/2019 7:05:00 PM (Run: 1)	302.647	240.908	0.796001		0.0487443	3.27563	1.93529	3.07406	0.180544	2.11844	0.651109	5.53881	2.11844	0.0777431	2.22756		1140.32	44.2975	1093.37	20.5796	1069.95	20.885	6.17094		162.499	25.7564	2464.08	0.887415		9.3911	0.147121	5.33778	13.4006	0.463492	67.9424	25.4731	272.352	94.2051	354.214	80.8907	740.676	91.847	9306.91	0.94309	240.908	302.647		0.0387977	15.3449
FC1 367 8/19/2019 7:06:57 PM (Run: 1)	294.558	233.976	0.794329		0.0512473	4.37511	1.91257	3.04591	0.181198	2.27963	0.712781	5.51882	2.27963	0.0765532	2.02011		1109.57	40.3549	1085.48	20.309	1073.52	22.5431	3.24932		219.083	22.8247	2409.66	0.642017		8.83277	0.345909	7.01128	12.0314	0.262547	63.3498	23.9567	263.951	91.4826	356.744	78.9324	704.585	88.457	9104.08	0.952624	233.976	294.558		0.0912208	14.4326
FC1 370 8/19/2019 8:00:09 PM (Run: 1)	351.473	263.154	0.748717		0.052211	3.33087	1.94798	3.72065	0.183855	2.587	0.669923	5.43906	2.587	0.0768435	2.67408		1117.13	53.3592	1097.75	24.9637	1088	25.8995	2.60736		260.931	27.5775	2569.57	1.03652	0.0313645	9.75451	0.510012	8.18071	17.5703	0.506109	67.2391	23.914	282.024	96.0022	381.578	83.6002	780.775	93.7342	8663.43	1.08449	263.154	351.473		0.13234	15.9387
FC1 371 8/19/2019 8:02:07 PM (Run: 1)	301.683	238.467	0.790457		0.0513085	3.69546	1.95359	3.09517	0.183792	2.04141	0.620891	5.44093	2.04141	0.0770912	2.32652		1123.55	46.3798	1099.68	20.7872	1087.66	20.4314	3.19473		133.455	25.9112	2475.3	0.952204		9.59141	0.197248	5.50395	15.6916	0.536554	69.7944	23.9324	268.183	90.7044	360.303	79.3365	716.383	89.5024	9111.06	0.762243	238.467	301.683		0.0520168	15.6722
FC1 374 8/19/2019 8:51:34 PM (Run: 1)	329.773	252.027	0.764244		0.0529917	4.83974	1.91992	3.60541	0.184646	2.95798	0.797713	5.41578	2.95798	0.0754122	2.06139		1079.49	41.3646	1088.04	24.0711	1092.3	29.7211	-1.18682		182.727	26.3129	2545.17	1.00797		9.00393	0.473439	6.9195	16.2227	0.574735	67.5968	24.2843	276.31	92.2395	365.6	81.0577	735.182	93.414	8825.39	1.0475	252.027	329.773		0.124852	14.7123
FC1 375 8/19/2019 8:53:31 PM (Run: 1)	347.518	261.21	0.751645		0.0532913	3.62073	1.915	3.60586	0.187288	2.02896	0.529581	5.33938	2.02896	0.0741581	2.98086		1045.77	60.1181	1086.33	24.053	1106.67	20.6322	-5.82316		297.48	28.381	2614.37	1.1619	0.0500034	9.63133	0.556982	9.62883	15.6399	0.514927	70.5538	26.272	285.288	96.4538	379.133	84.4059	762.282	92.378	9048.48	1.02054	261.21	347.518		0.210985	15.7375
FC1 378 8/19/2019 9:46:50 PM (Run: 1)	320.561	255.755	0.797835		0.0520985	4.00434	1.88797	4.132	0.181393	2.37683	0.550702	5.51291	2.37683	0.0754874	3.37996		1081.53	67.8015	1076.87	27.4279	1074.58	23.5257	0.642915		207.017	26.3791	2671.52	1.48046		10.0317	0.384154	7.07476	15.2519	0.404615	71.6147	25.8219	283.697	93.6915	371.261	83.4841	742.608	93.9776	9501.97	0.922801	255.755	320.561		0.101306	16.3917
FC1 379 8/19/2019 9:48:47 PM (Run: 1)	307.304	246.777	0.803039		0.0534221	3.96117	1.90861	3.50633	0.185447	2.30056	0.626263	5.39238	2.30056	0.0746442	2.64609		1058.94	53.2605	1084.1	23.3623	1096.66	23.2001	-3.56199		184.091	24.6246	2514.26	1.10318		9.38015	0.204514	6.39394	15.1803	0.372327	70.2781	25.0645	274.32	92.5747	371.139	79.7233	729.242	92.1835	9439.34	0.714362	246.777	307.304		0.053933	15.327
FC1 382 8/19/2019 10:42:15 PM (Run: 1)	330.623	260.458	0.787781		0.0499461	2.53468	1.82848	3.86004	0.183499	2.47773	0.61676	5.44962	2.47773	0.0722696	2.95986		993.55	60.1688	1055.73	25.3372	1086.06	24.765	-9.31118		199.644	25.4125	2607.65	0.729743		10.1863	0.422194	8.20894	15.964	0.659322	68.4932	25.9506	275.385	93.9772	368.946	82.4962	760.122	94.4341	9193.66	0.818999	260.458	330.623		0.111338	16.6443
FC1 383 8/19/2019 10:44:12 PM (Run: 1)	334.511	255.186	0.762861		0.0516682	4.47951	1.94027	3.51233	0.187495	2.28613	0.620952	5.33348	2.28613	0.0750535	2.66647		1069.94	53.5822	1095.09	23.5342	1107.79	23.269	-3.53736		166.648	26.959	2558.66	0.786094	0.0342103	9.19179	0.473045	9.37037	16.6891	0.47182	70.7663	25.1447	274.206	92.0095	368.287	84.1216	742.528	93.9015	8982.04	0.889011	255.186	334.511		0.144347	15.0193
FC1 386 8/19/2019 11:37:37 PM (Run: 1)	328.265	264.969	0.807179		0.0478035	3.66023	1.9274	3.78012	0.182184	3.03814	0.782757	5.48896	3.03814	0.0767293	2.24922		1114.14	44.9019	1090.64	25.2712	1078.89	30.1822	3.16341		175.982	26.8163	2641.56	1.01476		9.9833	0.321027	6.84929	15.1103	0.473643	70.0319	25.4688	287.959	94.6056	376.094	80.9852	742.567	94.636	9539.81	0.614023	264.969	328.265		0.0846591	16.3126
FC1 387 8/19/2019 11:39:34 PM (Run: 1)	324.511	260.335	0.802238		0.04977	2.90459	1.8963	2.83281	0.182467	1.99412	0.661322	5.48043	1.99412	0.0753737	2.01204		1078.48	40.3802	1079.79	18.8326	1080.44	19.8365	-0.182119		146.145	26.4792	2572.86	1.09061		9.79764	0.309208	8.2768	15.8405	0.405903	64.6265	24.917	276.608	94.259	374.844	82.1836	746.033	89.5052	9280.32	1.14604	260.335	324.511		0.0815422	16.0092
Jan 6th, 2019 - UC Santa Barbara
Laser Ablation used a laser spot size of 25 microns
Bold indicates preferred date
Bold Italics indicateds zircon trace element ratios used in Fig. S4
Aug 19th, 2019 Experiment 1 - Boise State University
Isotope ratio and date errors include systematic calibration errors of 0.70% (207Pb/206Pb) and 0.85% (206Pb/238U) (all 2-sigma).
Isotope ratios and ages corrected using a measured linear secondary standard age bias - 206Pb count rate relationship.
Trace element concentrations in ppm, calculated using mean count rate method.
Sweep-by-sweep downhole fractionation of U/Pb ratios NOT corrected via Si/Zr fractionation factor.
Ablation used a laser spot size of 15 microns, and a laser firing repetition rate of 10 Hz.
Bold indicates preferred date; Bold and Italics indicates zircon trace element ratios plotted in Fig. S4
[truncated: 24 more columns]

## Sheet: G47972
Hodgin, E.B., et al., 2020, A link between rift-related volcanism and end-Ediacaran extinction? Integrated chemostratigraphy, biostratigraphy, and U-Pb geochronology from Sonora, Mexico: Geology, v. 49, https://doi.org/10.1130/G47972.1
